# Supplementary material for: Rapid cell-free forward engineering of novel genetic ring oscillators
Source: eLife. 2015 Oct 5;4:e09771. doi: 10.7554/eLife.09771 (PMC4714972; doi:10.7554/eLife.09771)
Supplement: Figure 1—source data 1. — Shown are time estimates per step for each process. Assumption is that modular PCR fragments exist that can be assembled into Linear DNA. Parts used from Sun et al., (2014) Supplementary Table S2. DOI: http://dx.doi.org/10.7554/eLife.09771.004 [file elife-09771-fig1-data1.xlsx]

## Sheet: Sheet1
Cell-free Prototyping in TX-TL							Traditional Prototyping
Task			Time to complete task				Task				Time to complete task
PCR of segments			na (1)				PCR of segments				1h15min
Assembly reaction			1h (2)				DpnI digest				5min
PCR of linear DNA			1h15min				Assembly reaction				1h (4)
PCR Cleanup			15min				Transformation and Recovery				1h30min
Setup TX-TL			15min-3h (3)				Overnight growth on plates				16h
Run TX-TL			1h-72h (3)				Colony isolation and liquid media growth				8h
							Miniprep				30min
							Sequencing				18h (5)
							Repeat cloning				0h-weeks (6)
							Setup cellular experiment				1h-48h (7)
							Run cellular experiment				5h-72h
Total			~4h-78h				Total				~52h-weeks
Figure 1 - Source data table 1:
Comparison of a Test Cycle in TX-TL vs. a Test Cycle in traditional prototyping. Shown are estimates per step for each process. Assumption is that modular PCR fragments exist that can be assembled into Linear DNA. Parts used from Sun et al. (2014) Supplementary Table S2.
(1) Assumes a library of pre-made parts are present that can be assembled modularly. If not available, add 1h35m of time for PCR, DpnI, and PCR purification
(2) Assembly reaction is based on linear DNA assembly time
(3) Short estimates are for prototyping in batch-mode reactions; longer estimates for using microfluidic chip device and steady state measurements
(4) Assembly reaction is based on Isothermal assembly or Golden Gate assembly
(5) Assumes overnight sequencing reaction
(6) Repeat cloning assumes technical difficulties in obtaining cloning product, or multiple cloning steps necessary to obtain cellular-compatible plasmids
(7) High end estimate includes the transformation of plasmid into test strain
