# Supplementary material for: Rapid cell-free forward engineering of novel genetic ring oscillators
Source: eLife. 2015 Oct 5;4:e09771. doi: 10.7554/eLife.09771 (PMC4714972; doi:10.7554/eLife.09771)
Supplement: Figure 3—source data 1. — Parameter values of repressor – promoter pairs were determined by fitting to the Hill equation (Materials and methods). Promoter sequences were taken from the references cited. DOI: http://dx.doi.org/10.7554/eLife.09771.012 [file elife-09771-fig3-data1.xlsx]

## Sheet: Sheet1
	Figure 3 – source data table 1:
	Transfer function parameters. Parameter values of repressor – promoter pairs were determined by fitting to the Hill equation (Materials and Methods). Promoter sequences were taken from the references cited.
	Name	KM	n	ymin
	CI – pCI (1)	5.9	1.9	0.04
	CI – pCI(OR2*) (2)	103	1.2	0
	LacI – pLacI(r) (1)	4.1	1.9	0.01
	TetR – pTetR(r) (1)	2.3	1.2	0.02
	LacI – pLacI (4)	3.6	1.7	0.01
	SrpR – pSrpR (3)	86	3.6	0
	PhlF – pPhlF (3)	79	2	0
	TetR – pTetR (3)	7.6	0.8	0
	BetI – pBetI (3)	75.4	1.7	0
	QacR – pQacR (3)	2	1.6	0.02
	References
	(1)	Elowitz MB, Leibler S (2000) A synthetic oscillatory network of transcriptional regulators. Nature 403(6767):335–338.
	(2)	Rosenfeld N, Young J, Alon U, Swain P, Elowitz M (2005) Gene Regulation at the Single-Cell Level. Science 307(5717):1962–1965.
	(3)	Stanton BC, et al. (2014) Genomic mining of prokaryotic repressors for orthogonal logic gates. Nature Chemical Biology 10(2):99–105.
	(4)	Lutz R, Bujard H (1997) Independent and tight regulation of transcriptional units in Escherichia coli via the LacR/O, the TetR/O and AraC/I1-I2 regulatory elements. Nucleic Acids Res 25(6):1203–1210.
