# Supplementary material for: Rapid cell-free forward engineering of novel genetic ring oscillators
Source: eLife journal article supplement (doi:10.7554/elife.09771), 2015-10-02

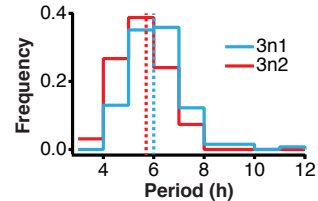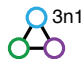

Median period = 6 h  
Periods:  $n = 131$   
Oscillations: 33/33 (100%)

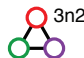

Median period = 5.7 h  
Periods:  $n = 191$   
Oscillations: 38/38 (100%)

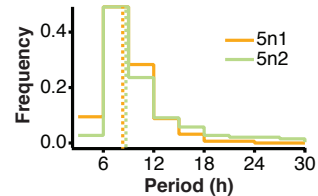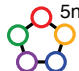

Median period = 8.3 h  
Periods:  $n = 159$   
Oscillations: 41/43 (95%)

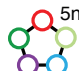

Median period = 8.7 h  
Periods:  $n = 330$   
Oscillations: 60/61 (98%)

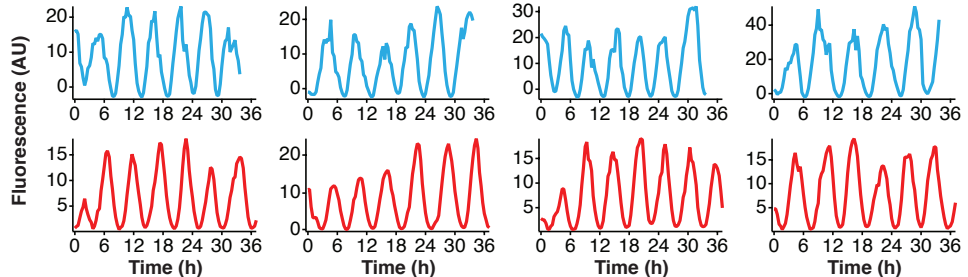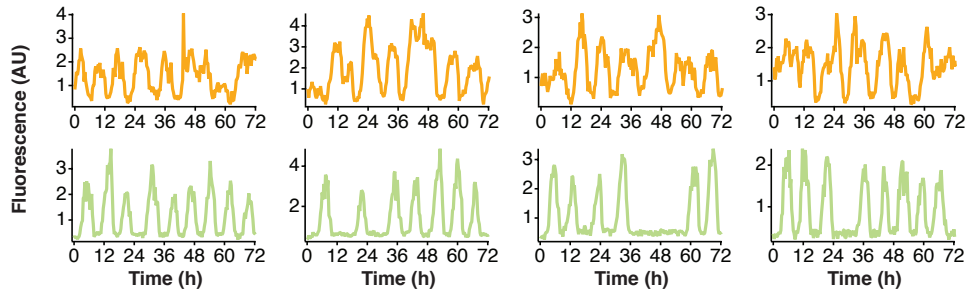

Supplement: supp [file elife-09771-supp-v1.zip]
