# Supplementary material for: Rapid cell-free forward engineering of novel genetic ring oscillators
Source: eLife journal article supplement (doi:10.7554/elife.09771), 2015-10-02

**Design:**  
5-node  
oscillator

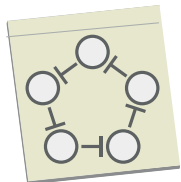

**Model:**  
in silico

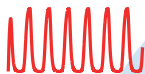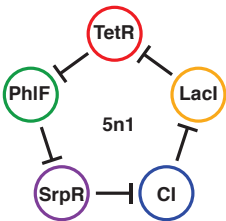

**Test:**  
Repressors in vitro

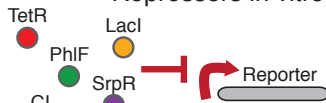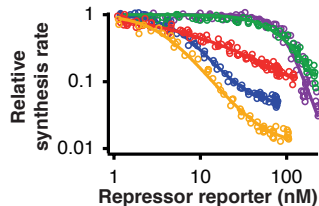

**Test:**  
Circuit on linear DNA

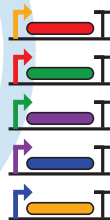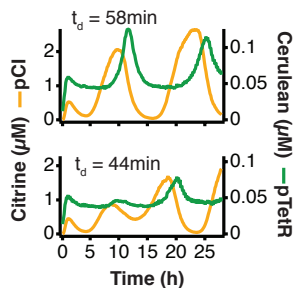

**Verify:**

Oscillator on plasmid  
for in vivo implementation

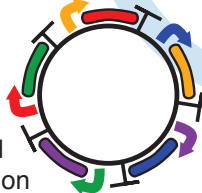

**Characterize:**

Periods and  
existence of oscillations

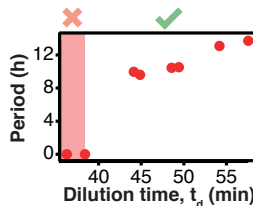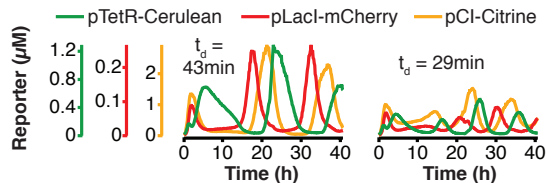

Supplement: supp [file elife-09771-supp-v1.zip]
