# Supplementary material for: Rapid cell-free forward engineering of novel genetic ring oscillators
Source: eLife journal article supplement (doi:10.7554/elife.09771), 2015-10-02
Supplement: supp [file elife-09771-supp-v1.zip]

## Supplementary file 1:

### A) Linear DNAs used in this study.

| Name                             | Description      | Notes |
|----------------------------------|------------------|-------|
| pJ23119-tetO-BCD2-phlF-ssrA(LAA) | # 3n2, 5n1, 4n   |       |
| pLacI-BCD2-tetR-ssrA(LAA)        | & 5n1, 4n        |       |
| pLambdaCI-BCD2-lacI-ssrA(LAA)    | % 5n1            |       |
| pPhlF-BCD2-srpR-ssrA(LAA)        | # 3n2, 5n1, 4n   |       |
| pSprR-BCD2-lambdaCI-ssrA(LAA)    | # 5n1            |       |
| pSrpR-BCD2-tetR-ssrA(LAA)        | # 3n2            |       |
| pPhlF-BCD2-srpR                  | # 3n2/no-ssrA    |       |
| pSrpR-BCD2-tetR                  | # 3n2/no-ssrA    |       |
| pTetR-BCD2-phlF                  | # 3n2/no-ssrA    |       |
| pSrpR-BCD2-lacI-ssrA(LAA)        | # 4n             |       |
| pBetI-BCD7-QacR-ssrA(LAA)        | # 5n2            |       |
| pPhlF-BCD7-srpR-ssrA(LAA)        | # 5n2            |       |
| pQacR-BCD7-tetR-ssrA(LAA)        | # 5n2            |       |
| PSrpR-BCD7-BetI-ssrA(LAA)        | # 5n2            |       |
| pTetR-BCD7-phlF-ssrA(LAA)        | # 5n2            |       |
| pJ23151-BCD7-betI                | \$ transfer fxns |       |
| pJ23151-BCD7-lacI                | \$ transfer fxns |       |
| pJ23151-BCD7-lambdaCI            | \$ transfer fxns |       |
| pJ23151-BCD7-phlF                | \$ transfer fxns |       |
| pJ23151-BCD7-qacR                | \$ transfer fxns |       |
| pJ23151-BCD7-srpR                | \$ transfer fxns |       |
| pJ23151-BCD7-tetR                | \$ transfer fxns |       |
| pLacI-BCD2-sfGFP-ssrA(LAA)       | & test reporter  |       |
| pLambdaCI-BCD2-sfGFP-ssrA(LAA)   | % test reporter  |       |
| pPhlF-BCD2-sfGFP-ssrA(LAA)       | # test reporter  |       |
| pSrpR-BCD2-sfGFP-ssrA(LAA)       | # test reporter  |       |
| pTetR-BCD2-sfGFP-ssrA(LAA)       | # test reporter  |       |

# Promoter from Stanton et al. (2014)

\$ Promoter from Anderson promoter panel

% Promoter from Elowitz and Leibler (2000)

& Promoter from Lutz and Bujard (1997)

## B) Plasmids used in this study.

| Name                          | Description                                 | Resistance | Copy number | Notes                                |
|-------------------------------|---------------------------------------------|------------|-------------|--------------------------------------|
| pZS1                          | % Original repressilator plasmid            | ampR       | pSC101      |                                      |
| pZS1 w/ OR2* mutation         | %                                           | ampR       | pSC101      | minimize passages                    |
| pZE21-GFP(AAV)                | % Original repressilator reporter (pTetO1)  | kanR       | colE1       |                                      |
| pZE21-eGFP(ASV)               | % pZE21-GFPAAV with eGFP replacement        | kanR       | colE1       |                                      |
| pET21a(+)-Histag-Cerulean     | Expression vector for Cerulean purification | ampR       | colE1       | c. Transcriptic Inc.                 |
| pET21a(+)-Histag-Citrine      | Expression vector for Citrine purification  | ampR       | colE1       | c. Transcriptic Inc.                 |
| pET21a(+)-Histag-mCherry      | Expression vector for mCherry purification  | ampR       | colE1       | c. Transcriptic Inc.                 |
| pTetR(r)-BCD7-Citrine         | % transfer fxns                             | kanR       | pSC101*     |                                      |
| pTetR-BCD7-Citrine            | # transfer fxns                             | kanR       | pSC101*     | c. Transcriptic Inc.                 |
| pSrpR-BCD7-Citrine            | # transfer fxns                             | kanR       | pSC101*     | c. Transcriptic Inc.                 |
| pQacR-BCD7-Citrine            | # transfer fxns, in vitro reporter          | kanR       | pSC101*     | c. Transcriptic Inc.                 |
| pPhlF-BCD7-Citrine            | # transfer fxns, in vitro reporter          | kanR       | pSC101*     | c. Transcriptic Inc.                 |
| pLacI-BCD7-Citrine            | & transfer fxns                             | kanR       | pSC101*     | c. Transcriptic Inc.                 |
| pLacI(r)-BCD7-Citrine         | % transfer fxns                             | kanR       | pSC101*     |                                      |
| pCI(OR2*)-BCD7-Citrine        | * transfer fxns                             | kanR       | pSC101*     |                                      |
| pCI-BCD7-Citrine              | % transfer fxns                             | kanR       | pSC101*     |                                      |
| pBetI-BCD7-Citrine            | # transfer fxns                             | kanR       | pSC101*     | c. Transcriptic Inc.                 |
| 3n1                           | oscillator plasmid                          | kanR       | pSC101*     | minimize passages                    |
| 3n2                           | oscillator plasmid                          | kanR       | pSC101*     | minimize passages                    |
| 5n1                           | oscillator plasmid                          | kanR       | pSC101*     | minimize passages                    |
| 5n2                           | oscillator plasmid                          | kanR       | pSC101*     | minimize passages                    |
| pBetI-BCD7-phlF-ssrA(LAA)     | # for building 3n1                          | ampR       | pSC101*     |                                      |
| pBetI-BCD7-qacR-ssrA(LAA)     | # for building 5n2                          | ampR       | pSC101*     |                                      |
| pLacO1-BCD7-tetR-ssrA(LAA)    | & for building 5n1                          | ampR       | colE1       | amplify in lacI repressor strain     |
| pLambdaCI-BCD7-lacI-ssrA(LAA) | % for building 5n1                          | ampR       | colE1       | amplify in lambdaCI repressor strain |
| pPhlF-BCD7-srpR-ssrA(LAA)     | # for building 3n1, 3n2, 5n1, 5n2           | ampR       | pSC101*     |                                      |
| pQacR-BCD7-tetR-ssrA(LAA)     | # for building 5n2                          | ampR       | pSC101*     |                                      |
| pSrpR-BCD7-betI-ssrA(LAA)     | # for building 3n1, 5n2                     | ampR       | pSC101*     |                                      |
| pSrpR-BCD7-lambdaCI-ssrA(LAA) | # for building 5n1                          | ampR       | pSC101*     |                                      |
| pSrpR-BCD7-tetR-ssrA(LAA)     | # for building 3n2                          | ampR       | pSC101*     |                                      |
| pTetR-BCD7-phlF-ssrA(LAA)     | # for building 3n2, 5n1, 5n2                | ampR       | colE1       | amplify in tetR repressor strain     |

|                                                  |                                         |      |       |                   |
|--------------------------------------------------|-----------------------------------------|------|-------|-------------------|
| pPhlF-BCD20-sfGFP-ssrA(LAA)                      | # 1 color strong reporter used in study | ampR | colE1 |                   |
| pPhlF-BCD22-sfGFP-ssrA(LAA)                      | # 1 color weak reporter used in study   | ampR | colE1 |                   |
| pPhlF-BCD20-Citrine-ssrA(LAA)                    | # for building 3-color reporter plasmid | ampR | colE1 |                   |
| pSrpR-BCD20-Cerulean-ssrA(LAA)                   | # for building 3-color reporter plasmid | ampR | colE1 |                   |
| pTetR-BCD20-mCherry-ssrA(LAA)                    | # for building 3-color reporter plasmid | ampR | colE1 |                   |
| 3-color BCD20 reporter, pPhlF/pSrpR/pJ23119-tetO | 3 color reporter plasmid                | cmR  | colE1 | minimize passages |
| pTetR(r)-Citrine(ASV)                            | % in vitro reporter                     | kanR | colE1 |                   |
| pTetR(r)-Cerulean(ASV)                           | % in vitro reporter                     | kanR | colE1 |                   |
| pLacI(r)-mCherry(ASV)                            | % in vitro reporter                     | kanR | colE1 |                   |
| pLacI(r)-Cerulean(ASV)                           | % in vitro reporter                     | kanR | colE1 |                   |
| pCI-Citrine-(ASV)                                | % in vitro reporter                     | kanR | colE1 |                   |
| pLacI(r)TetR(ASV)                                | % for initial conditions experiment     | kanR | colE1 |                   |
| pTetR(r)-CI(ASV)                                 | % for initial conditions experiment     | kanR | colE1 |                   |

- # Promoter from Stanton et al. (2014)
- \$ Promoter from Anderson promoter panel
- % Promoter from Elowitz and Leibler (2000)
- & Promoter from Lutz and Bujard (1997)
- \* Promoter from Rosenfeld et al. (2005)

**C) Strains used in this study.**

| <b>Name</b>                                            | <b><i>E. coli</i> type</b> | <b>Resistance</b> | <b>Notes</b>                          |
|--------------------------------------------------------|----------------------------|-------------------|---------------------------------------|
| Rosetta2                                               | JS006                      | cmR               |                                       |
| pZS1 + pZE21-GFP(AAV)                                  | JS006                      | kanR ampR         |                                       |
| pET21a(+)-Histag-Citrine                               | BL21-DE3                   | ampR              |                                       |
| pET21a(+)-Histag-Cerulean                              | BL21-DE3                   | ampR              |                                       |
| pET21a(+)-Histag-mCherry                               | BL21-DE3                   | ampR              |                                       |
| 3n1 + pPhlF-BCD20-sfGFP-ssrA(LAA)                      | JS006                      | kanR ampR         | minimize passages                     |
| 3n1 + pPhlF-BCD22-sfGFP-ssrA(LAA)                      | JS006                      | kanR ampR         | minimize passages                     |
| 3n2 + pPhlF-BCD20-sfGFP-ssrA(LAA)                      | JS006                      | kanR ampR         | minimize passages                     |
| 3n2 + pPhlF-BCD22-sfGFP-ssrA(LAA)                      | JS006                      | kanR ampR         | minimize passages                     |
| 5n1 + pPhlF-BCD20-sfGFP-ssrA(LAA)                      | JS006                      | kanR ampR         | cells unhealthy,<br>minimize passages |
| 5n1 + pPhlF-BCD22-sfGFP-ssrA(LAA)                      | JS006                      | kanR ampR         | minimize passages                     |
| 5n2 + pPhlF-BCD20-sfGFP-ssrA(LAA)                      | JS006                      | kanR ampR         | minimize passages                     |
| 5n2 + pPhlF-BCD22-sfGFP-ssrA(LAA)                      | JS006                      | kanR ampR         | minimize passages                     |
| 3n2 + 3-color BCD20 reporter, pPhlF/pSrpR/pJ23119-tetO | JS006                      | kanR cmR          | minimize passages                     |
| pZS1 + pZE21-eGFP(ASV)                                 | JS006                      | kanR ampR         |                                       |
| pZS1 w/ OR2* mutation + pZS21-eGFP(ASV)                | JS006                      | kanR ampR         |                                       |

#### D) DNA concentrations used in experiments.

| Experiment                                         | DNA and concentration                                                                         | Type of DNA |
|----------------------------------------------------|-----------------------------------------------------------------------------------------------|-------------|
| <b>Repressilator orig./O<sub>R</sub>2*, 3color</b> | Repressilator pZS1 or pZS1 w/ O <sub>R</sub> 2* mutation, 0.5 nM (if not otherwise indicated) | Plasmid     |
|                                                    | pTetR(r)-Cerulean(ASV), 5 nM                                                                  | Plasmid     |
|                                                    | pLacI(r)-mCherry(ASV), 5 nM                                                                   | Plasmid     |
|                                                    | pCI-Citrine(ASV), 5 nM                                                                        | Plasmid     |
| <b>Repressilator, initial conditions</b>           | <b>Reaction in nano-reactor:</b>                                                              |             |
|                                                    | Repressilator pZS1, 5 nM                                                                      | Plasmid     |
|                                                    | pLacI(r)-Cerulean(ASV), 5 nM                                                                  | Plasmid     |
|                                                    | pTetR(r)-Citrine-(ASV), 5 nM                                                                  | Plasmid     |
|                                                    | <b>Pre-synthesis reaction (CI):</b>                                                           |             |
|                                                    | pTetR(r)-Citrine(ASV), 5 nM                                                                   | Plasmid     |
|                                                    | pTetR(r)-CI(ASV), 5 nM                                                                        | Plasmid     |
|                                                    | <b>Pre-synthesis reaction (TetR):</b>                                                         |             |
|                                                    | pLacI(r)-Cerulean(ASV), 5 nM                                                                  | Plasmid     |
|                                                    | pLacI(r)TetR(ASV), 5 nM                                                                       | Plasmid     |
| <b>Response curve measurements</b>                 | Promoter plasmid: pXXX-BCD7-Citrine, 1 nM                                                     | Plasmid     |
|                                                    | Repressor template: pJ23151-BCD7-XXX, 0-2.5 nM                                                | Linear      |
|                                                    | Repressor reporter: pJ23151-BCD7-Cerulean, 0-2.5 nM                                           | Linear      |
| <b>3n1</b>                                         | 3n1 oscillator plasmid, 5 nM                                                                  | Plasmid     |
|                                                    | pPhlF-BCD7-Citrine, 2.5 nM                                                                    | Plasmid     |
| <b>3n2</b>                                         | pJ23119-tetO-BCD2-phlF-ssrA(LAA), 1.5 nM                                                      | Linear      |
|                                                    | pPhlF-BCD2-srpR-ssrA(LAA), 12 nM                                                              | Linear      |
|                                                    | pSrpR-BCD2-tetR-ssrA(LAA), 24 nM                                                              | Linear      |
|                                                    | pTetR(r)-Cerulean(ASV), 5 nM                                                                  | Plasmid     |
| <b>3n2/no-ssrA</b>                                 | pJ23119-tetO-BCD2-phlF, 1.5 nM                                                                | Linear      |
|                                                    | pPhlF-BCD2-srpR, 12 nM                                                                        | Linear      |
|                                                    | pSrpR-BCD2-tetR, 24 nM                                                                        | Linear      |
|                                                    | pTetR(r)-Cerulean(ASV), 5 nM                                                                  | Plasmid     |
| <b>4n</b>                                          | pJ23119-tetO-BCD2-phlF-ssrA(LAA), 0.75 nM                                                     | Linear      |
|                                                    | pLacI-BCD2-tetR-ssrA(LAA), 6 nM                                                               | Linear      |

|                         |                                          |         |
|-------------------------|------------------------------------------|---------|
|                         | pPhlF-BCD2-srpR-ssrA(LAA), 6 nM          | Linear  |
|                         | pSrpR-BCD2-lacI-ssrA(LAA), 12 nM         | Linear  |
|                         | pTetR(r)-Cerulean(ASV), 2.5 nM           | Plasmid |
|                         | pLacI(r)-mCherry(ASV), 2.5 nM            | Plasmid |
|                         | pPhlF-BCD7-Citrine, 2.5 nM               | Plasmid |
|                         |                                          |         |
| <b>5n1</b>              | pJ23119-tetO-BCD2-phlF-ssrA(LAA), 1.1 nM | Linear  |
|                         | pLacI-BCD2-tetR-ssrA(LAA), 16.8 nM       | Linear  |
|                         | pLambdaCI-BCD2-lacI-ssrA(LAA), 1.4 nM    | Linear  |
|                         | pPhlF-BCD2-srpR-ssrA(LAA), 5.6 nM        | Linear  |
|                         | pSrpR-BCD2-lambdaCI-ssrA(LAA), 11.2 nM   | Linear  |
|                         | pCI-Citrine(ASV), 3 nM                   | Plasmid |
|                         | pTetR(r)-Cerulean(ASV), 2.5 nM           | Plasmid |
|                         |                                          |         |
| <b>5n1, plasmid DNA</b> | 5n1 oscillator plasmid, 5 nM             | Plasmid |
|                         | pTetR(r)-Cerulean(ASV), 5 nM             | Plasmid |
|                         | pLacI(r)-mCherry(ASV), 5 nM              | Plasmid |
|                         | pCI-Citrine(ASV), 5 nM                   | Plasmid |
|                         |                                          |         |
| <b>5n2</b>              | pBetI-BCD7-QacR-ssrA(LAA), 1 nM          | Linear  |
|                         | pPhlF-BCD7-srpR-ssrA(LAA), 12 nM         | Linear  |
|                         | pQacR-BCD7-tetR-ssrA(LAA), 4 nM          | Linear  |
|                         | pSrpR-BCD7-BetI-ssrA(LAA), 24 nM         | Linear  |
|                         | pTetR-BCD7-phlF-ssrA(LAA), 4 nM          | Linear  |
|                         | pTetR(r)-Cerulean(ASV), 2.5 nM           | Plasmid |
|                         | pQacR-BCD7-Citrine, 2.5 nM               | Plasmid |
