# Supplementary figures and images for: Rapid cell-free forward engineering of novel genetic ring oscillators
Source: eLife journal article supplement (doi:10.7554/elife.09771), 2015-10-02

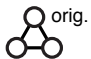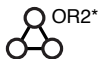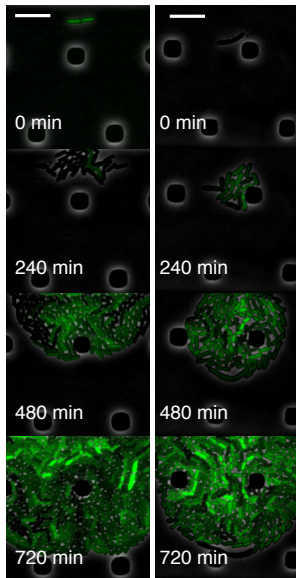

Supplement: supp [file elife-09771-supp-v1.zip]

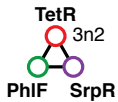

pPhIF

pTetR

pSrpR

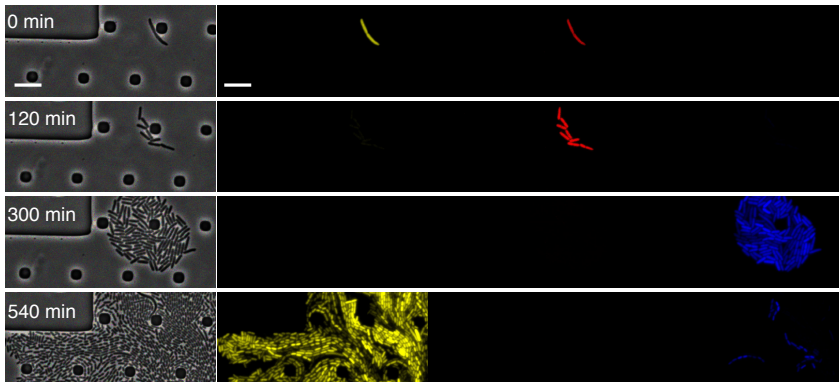

Supplement: supp [file elife-09771-supp-v1.zip]

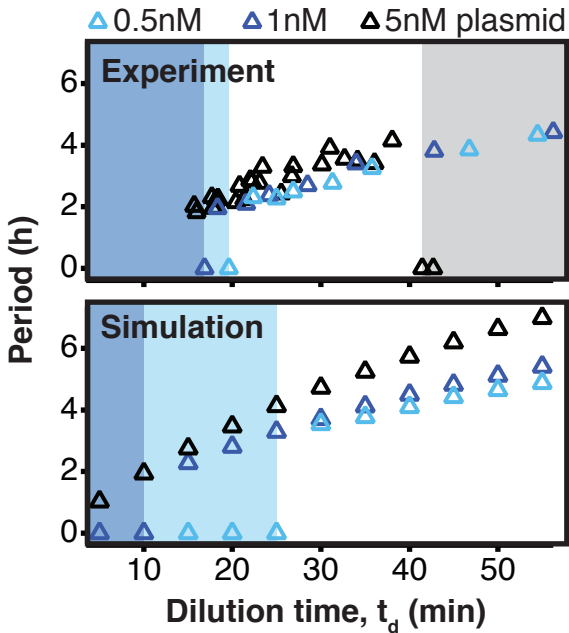

Supplement: supp [file elife-09771-supp-v1.zip]

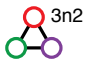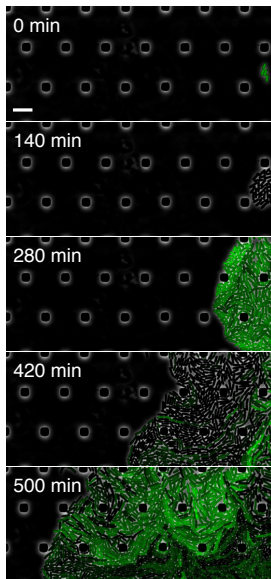

Supplement: supp [file elife-09771-supp-v1.zip]

Dilution time,  $t_d$

— 29 min — 36 min — 49 min

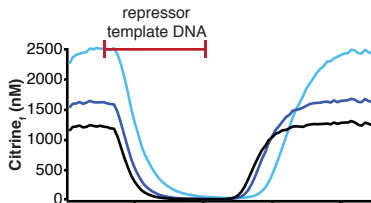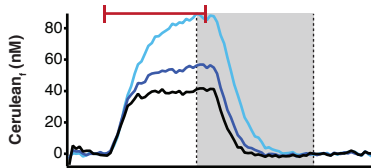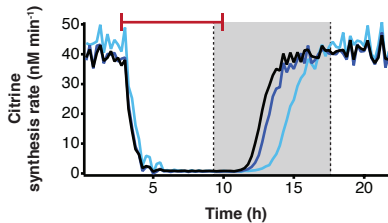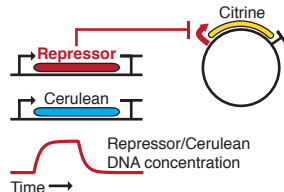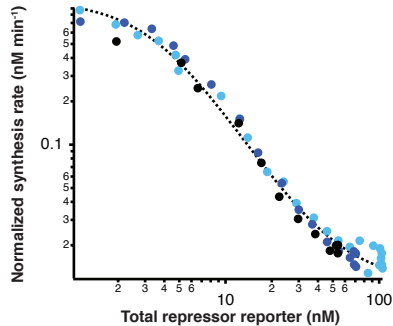

Supplement: supp [file elife-09771-supp-v1.zip]

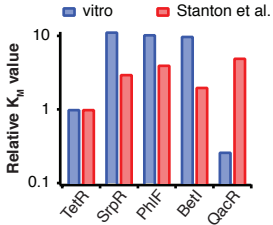

Supplement: supp [file elife-09771-supp-v1.zip]

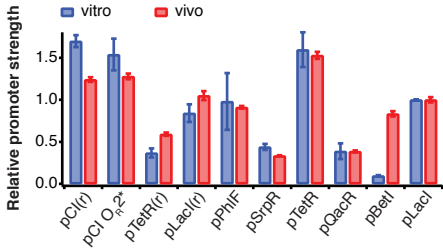

Supplement: supp [file elife-09771-supp-v1.zip]

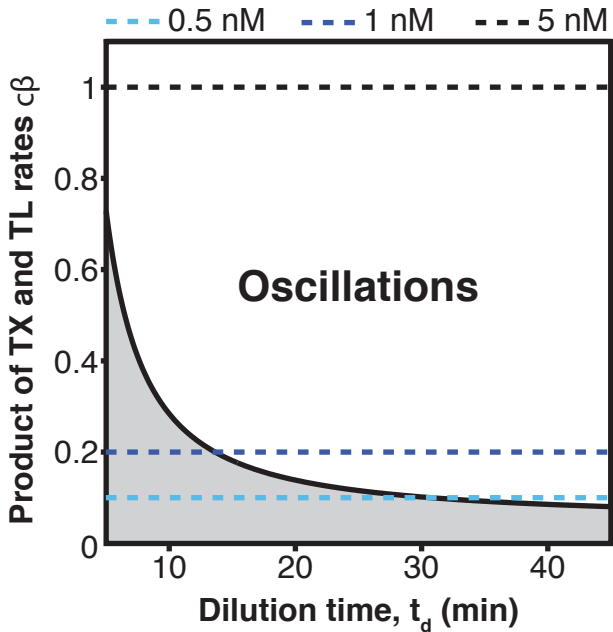

Supplement: supp [file elife-09771-supp-v1.zip]

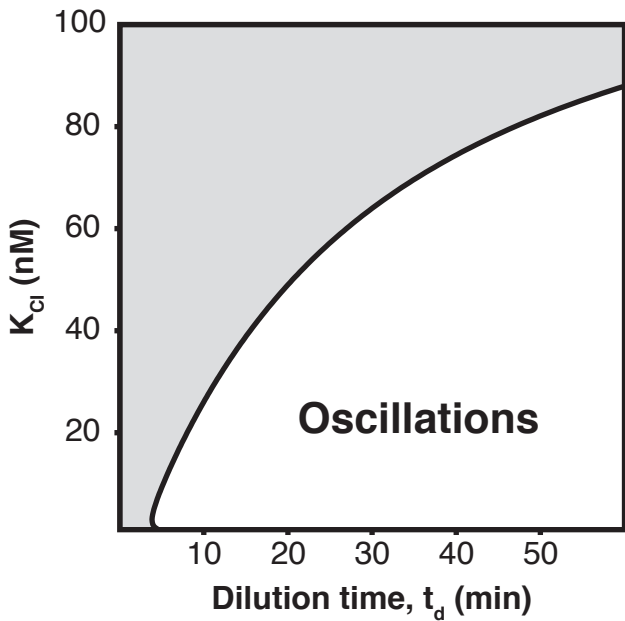

Supplement: supp [file elife-09771-supp-v1.zip]
